# Supplementary material for: Synthesis and Biological Evaluation of Novel Water-Soluble Poly-(ethylene glycol)-10-hydroxycamptothecin Conjugates
Source: MDPI journal article supplement (doi:10.3390/molecules20059393), 2015-05-21
Supplement: s1 [file s1]

# Supplementary Materials

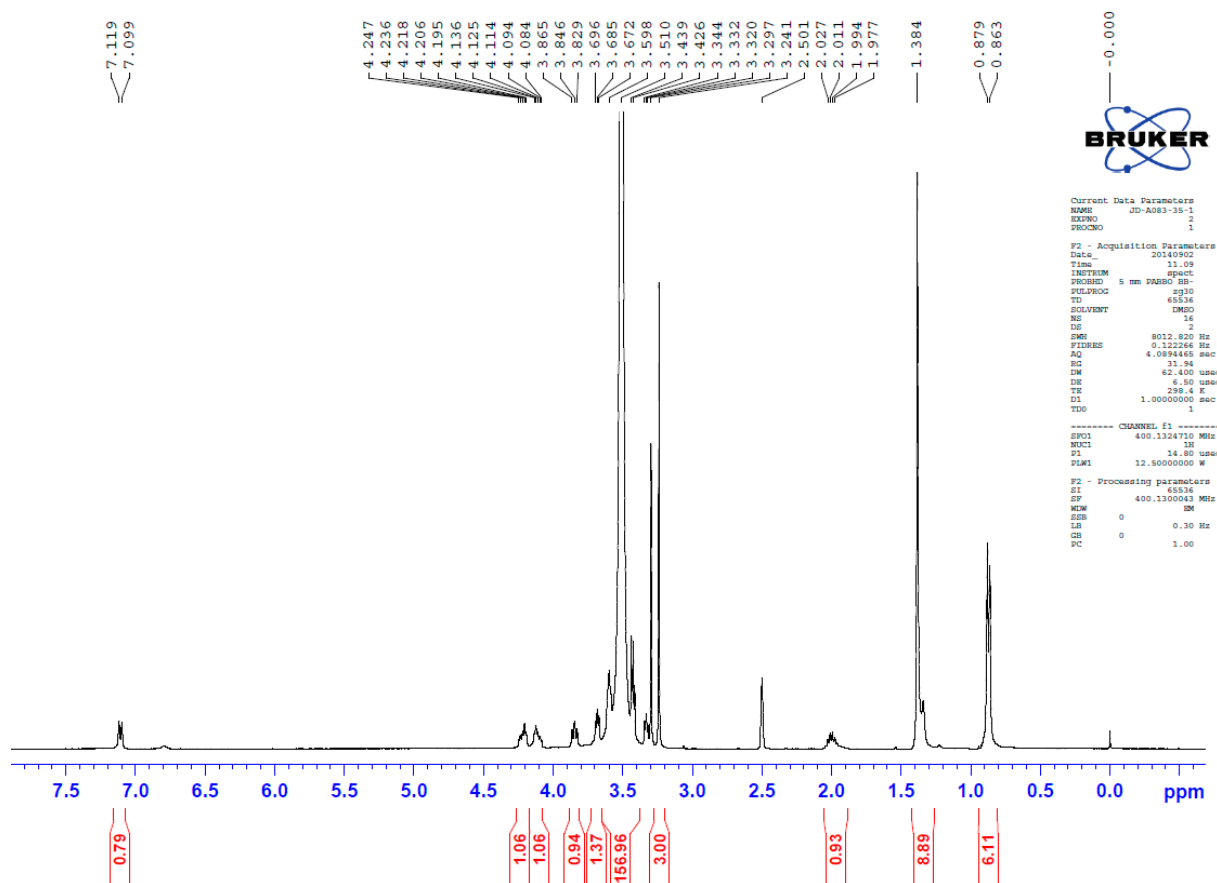

Figure S1. <sup>1</sup>H-NMR of compound 1a.

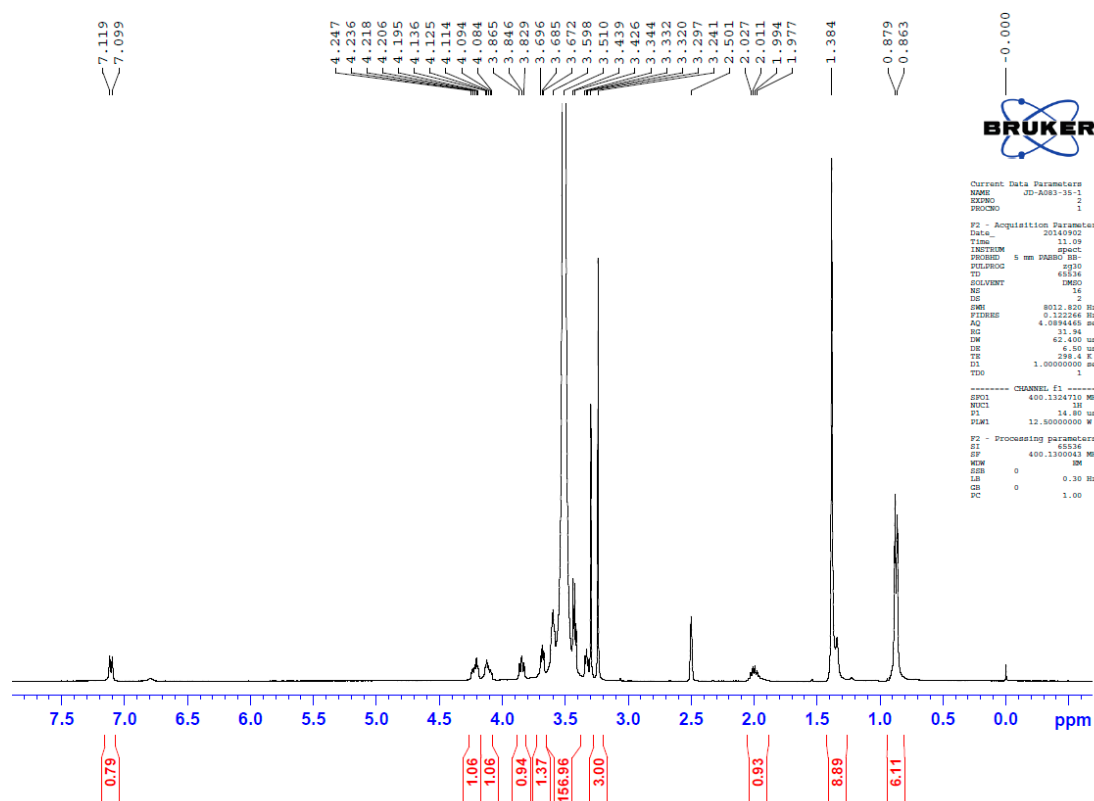

Figure S2. <sup>1</sup>H-NMR of compound 2b.

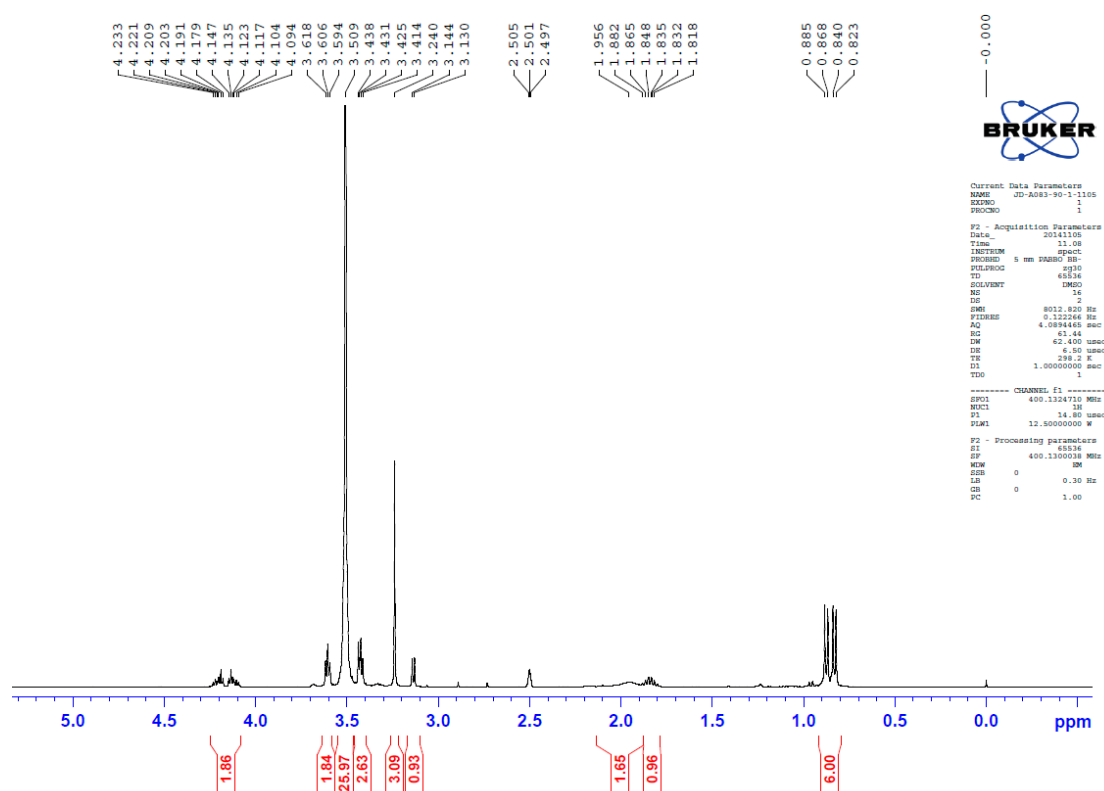Figure S3.  $^1\text{H}$ -NMR of compound 3a.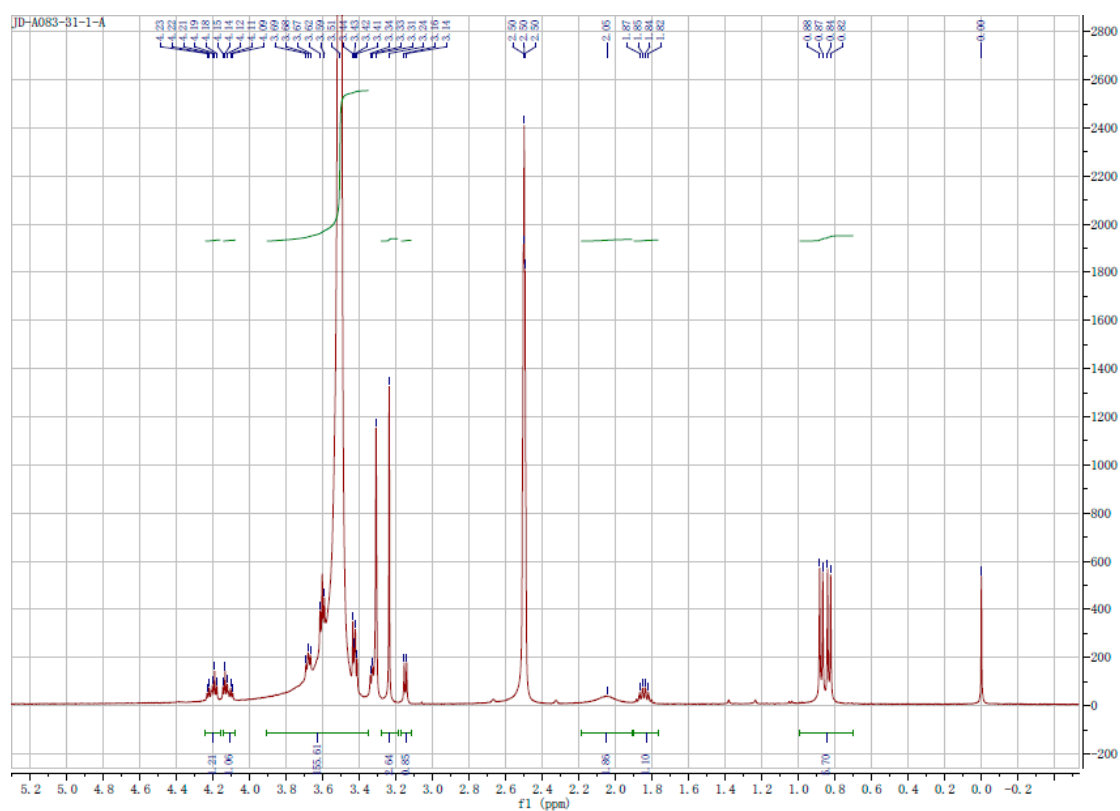Figure S4.  $^1\text{H}$ -NMR of compound 3b.

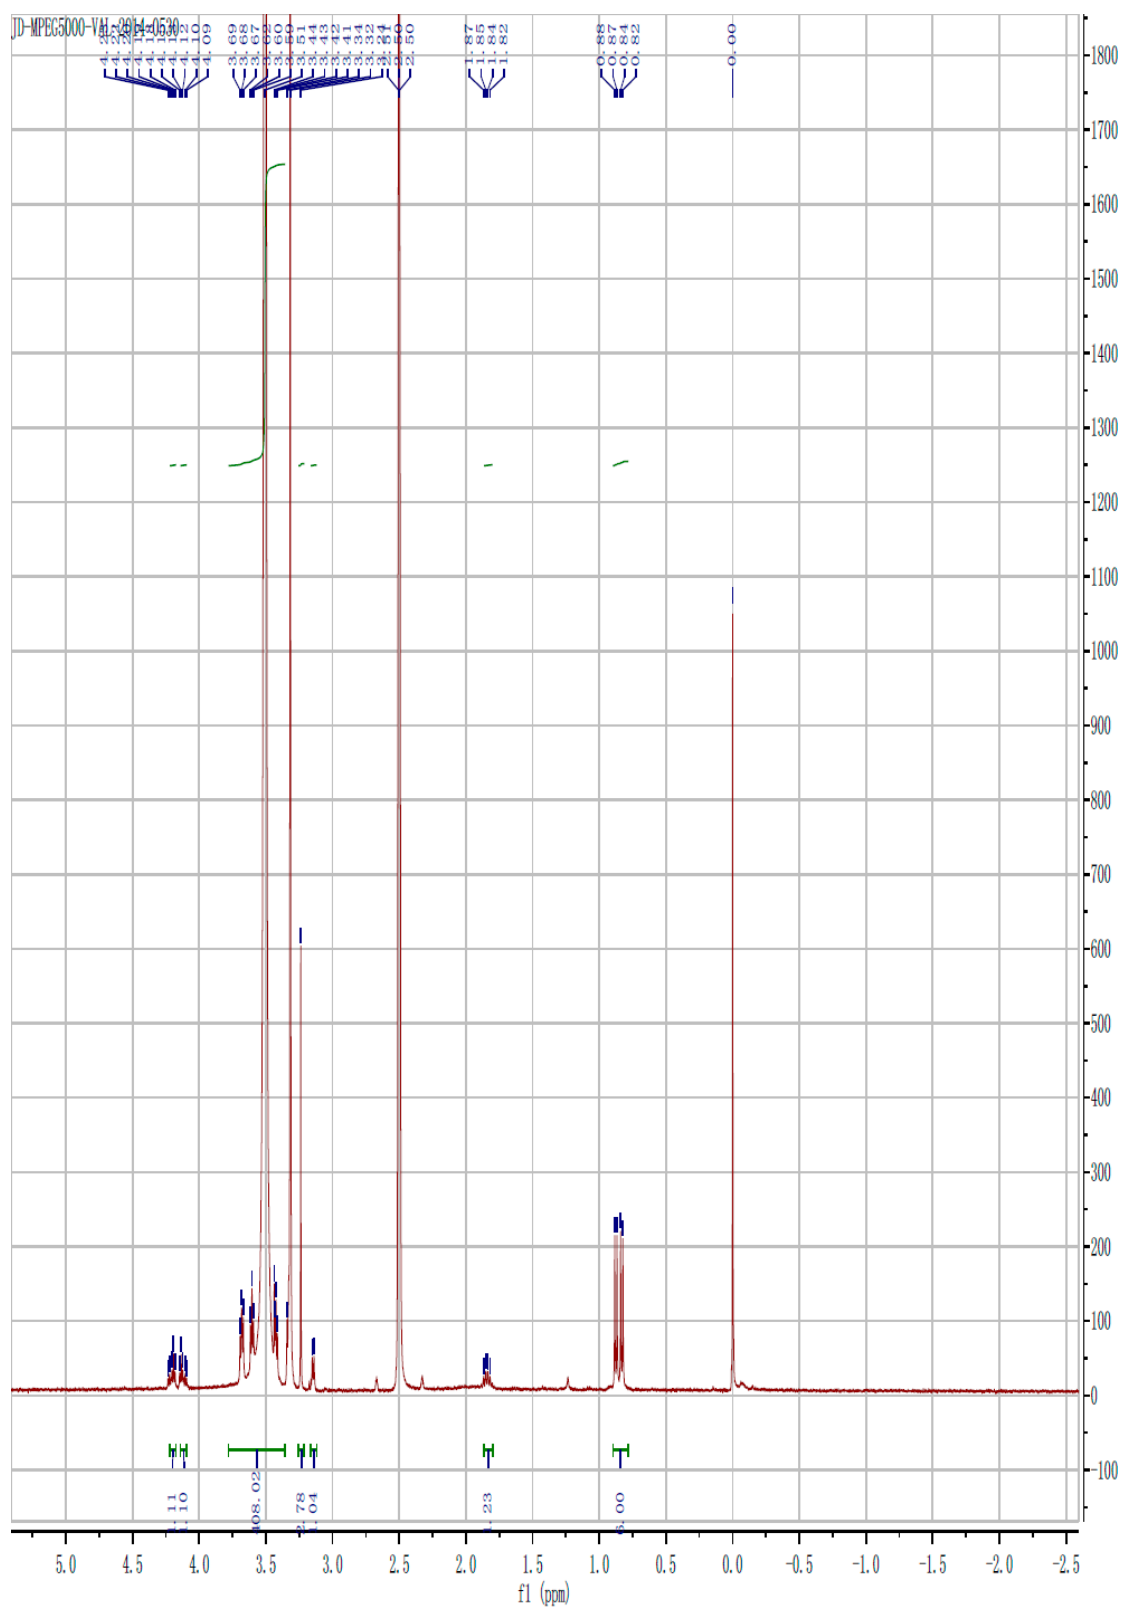

**Figure S5.**  $^1\text{H}$ -NMR of compound **3c**.

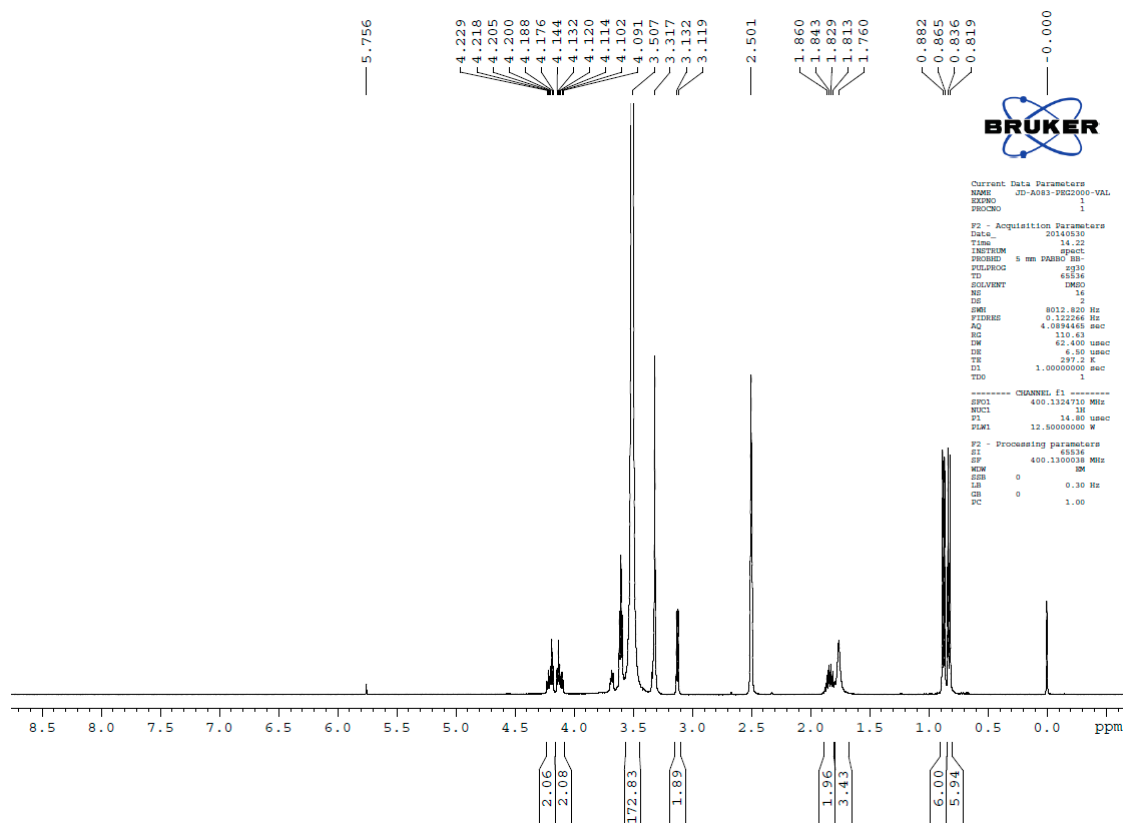

Figure S6.  $^1\text{H}$ -NMR of compound **3d**.

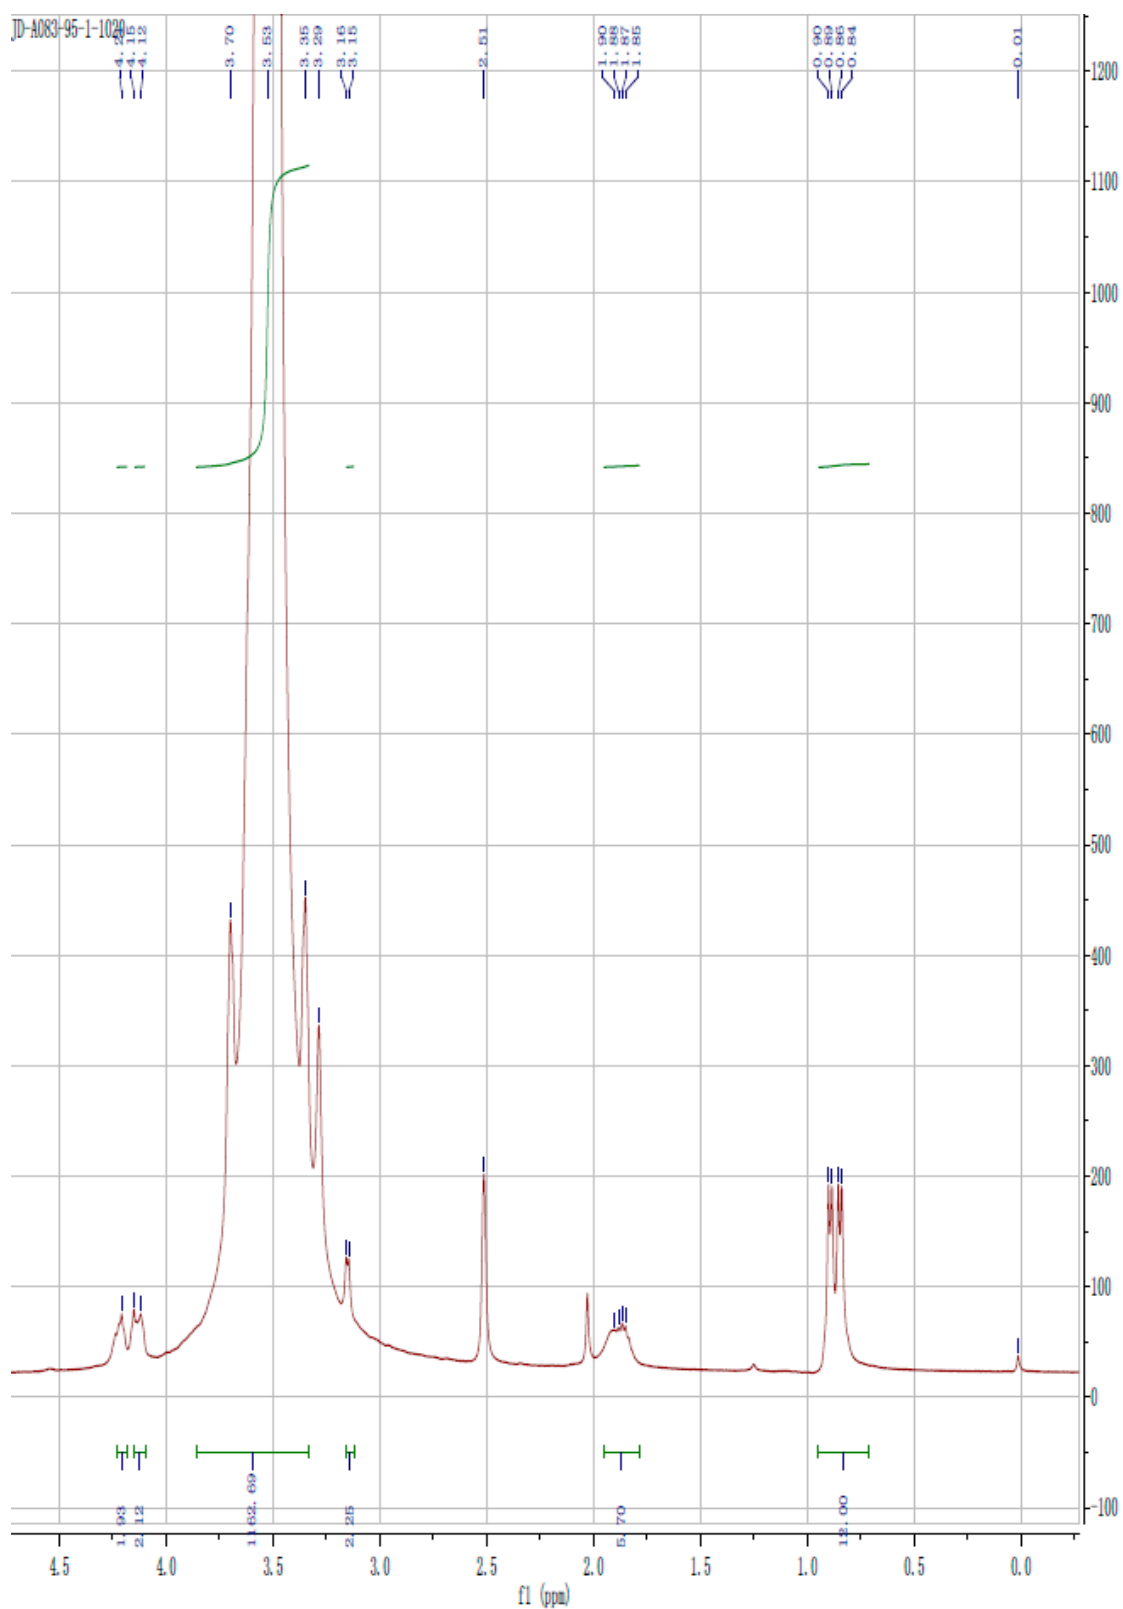

**Figure S7.**  $^1\text{H}$ -NMR of compound **3e**.

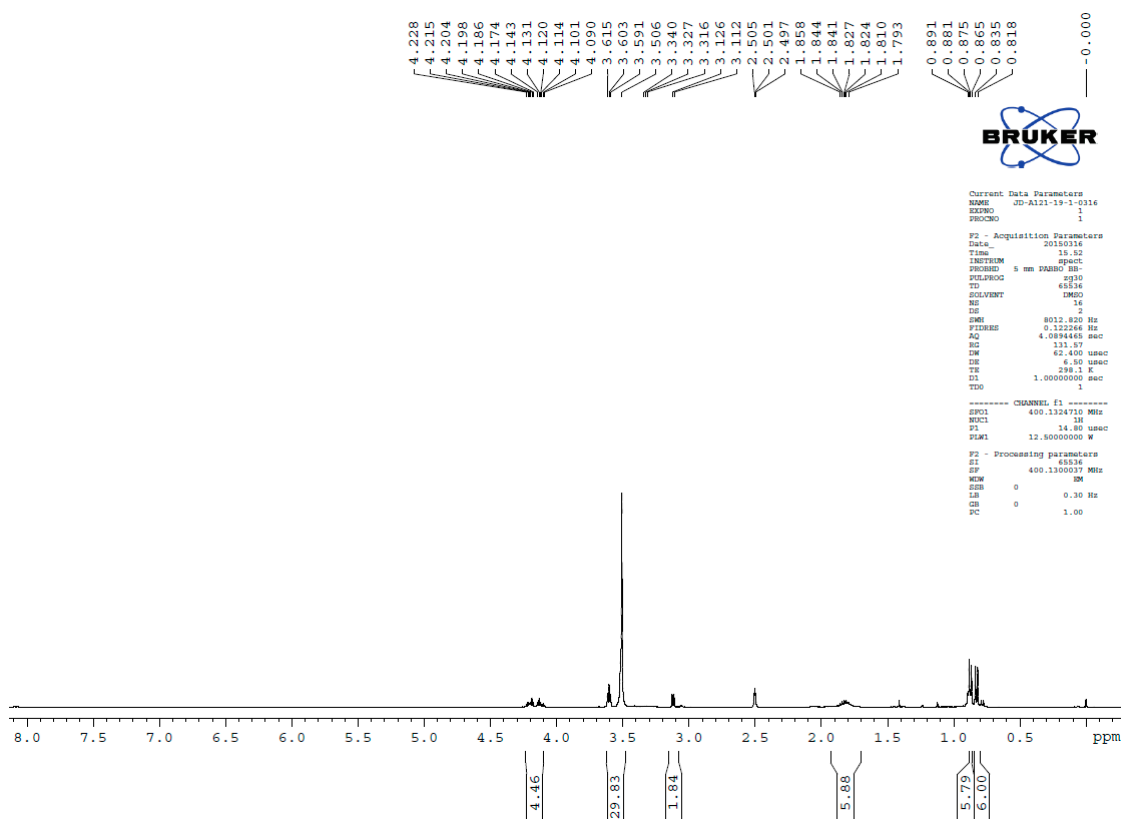Figure S8.  $^1\text{H}$ -NMR of compound **3f**.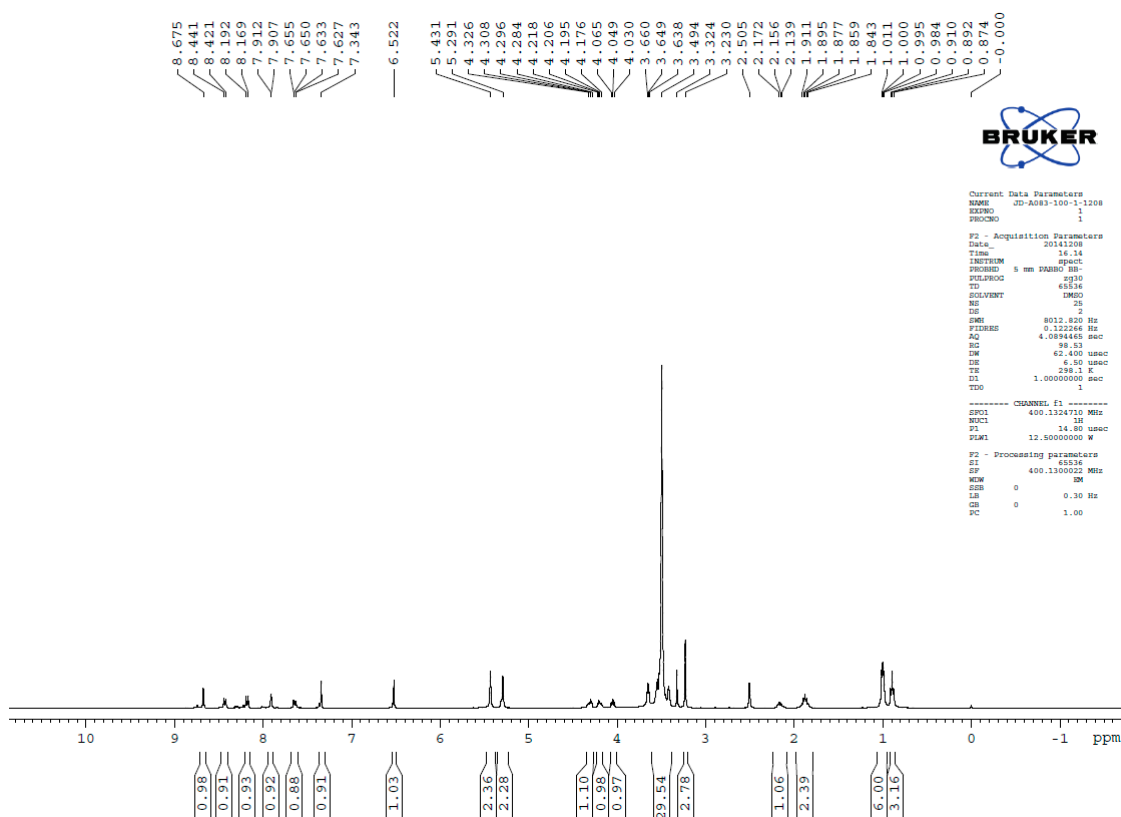Figure S9.  $^1\text{H}$ -NMR of compound **4a**.

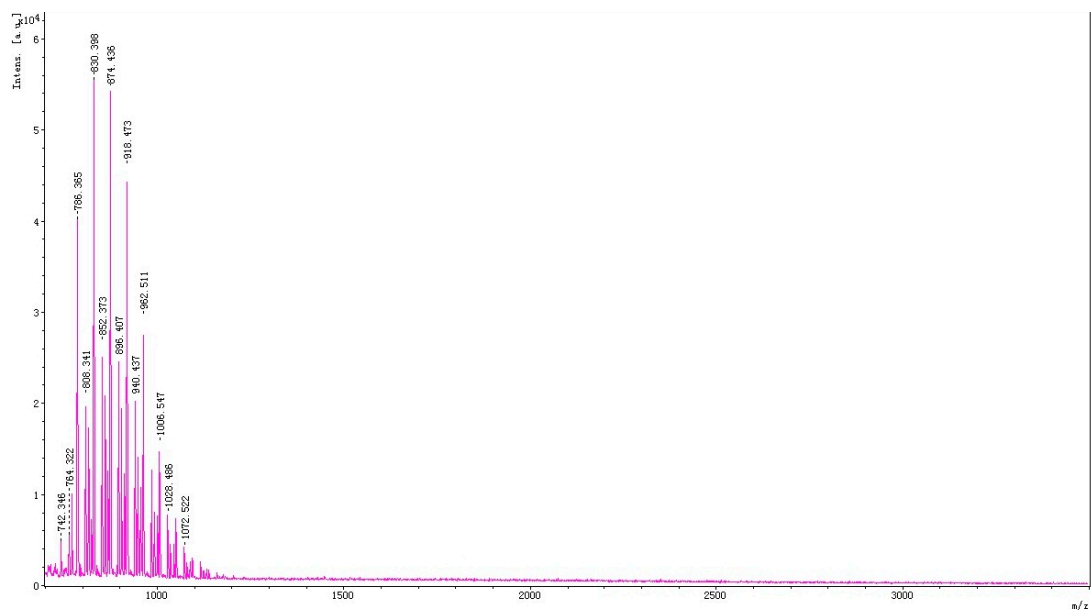

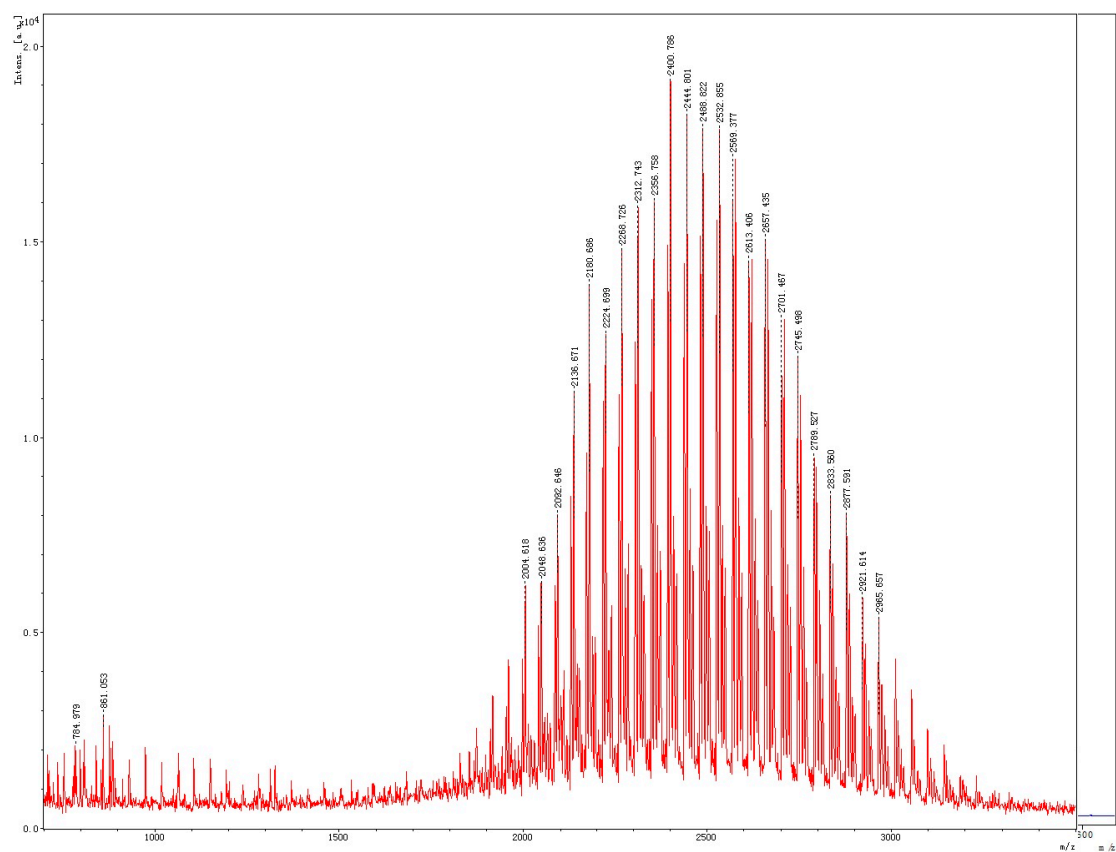



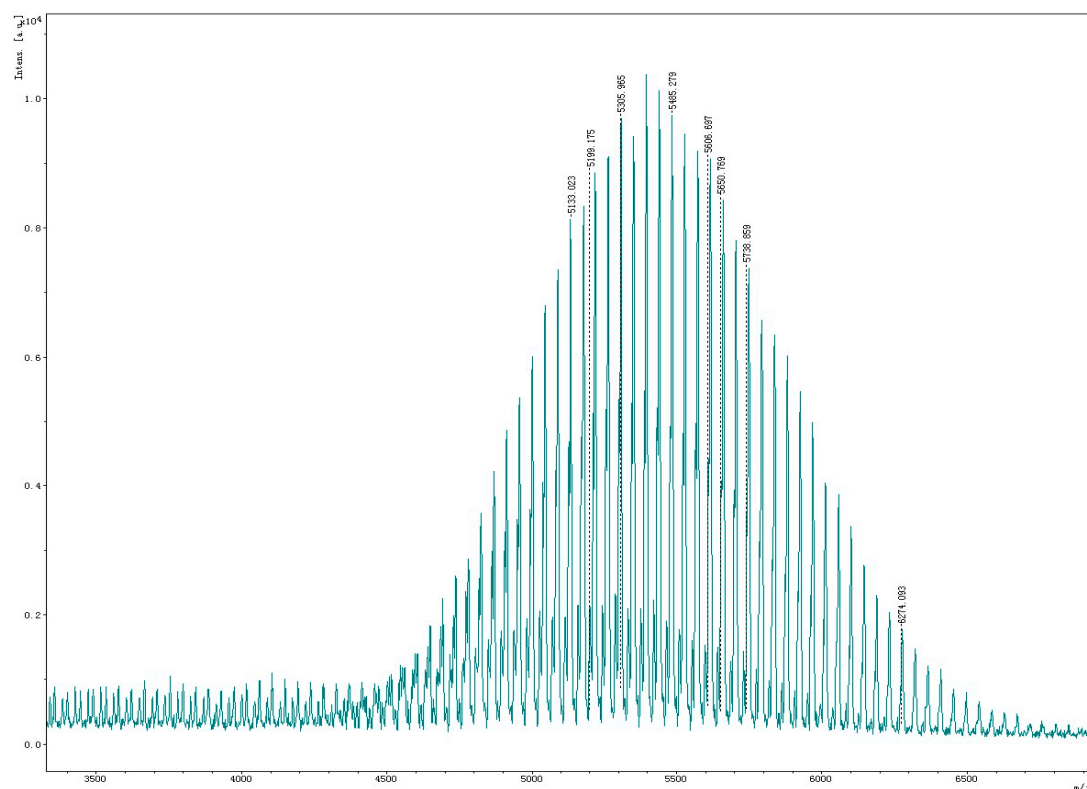

Figure S14. MALDI-TOF of compound 4c.

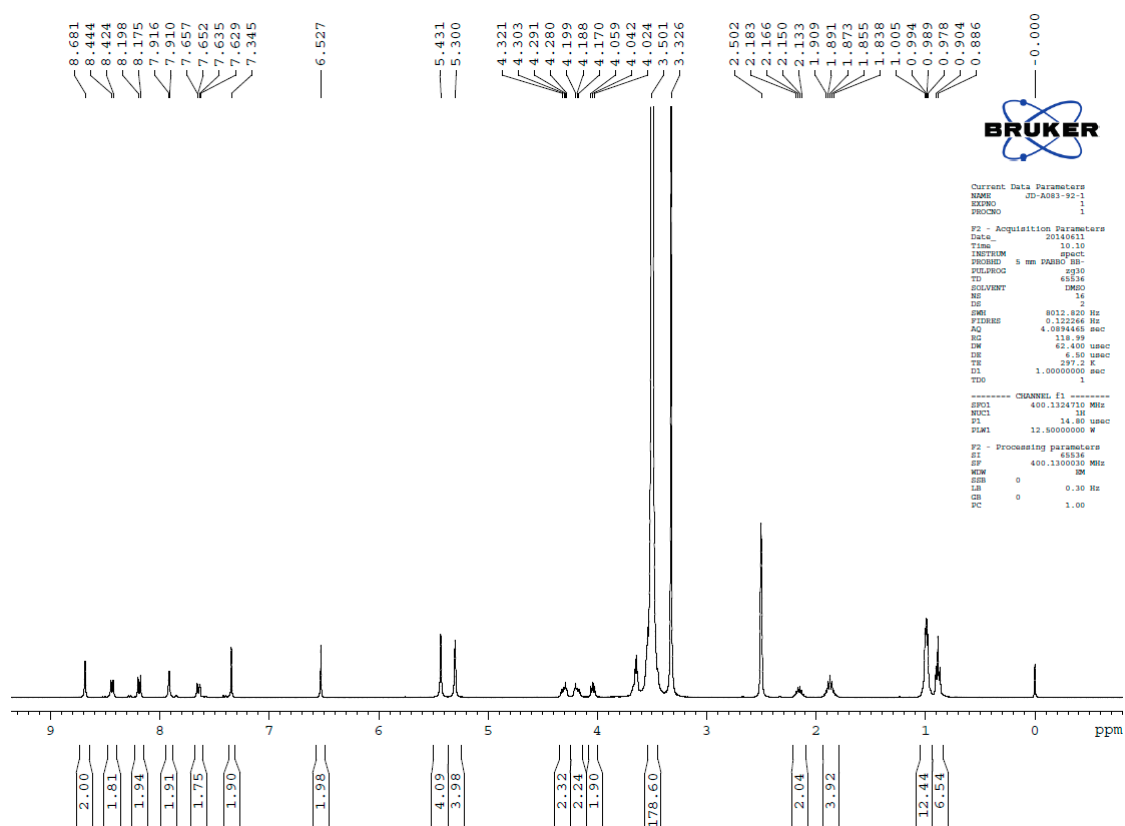Figure S15.  $^1\text{H}$ -NMR of compound 4d.

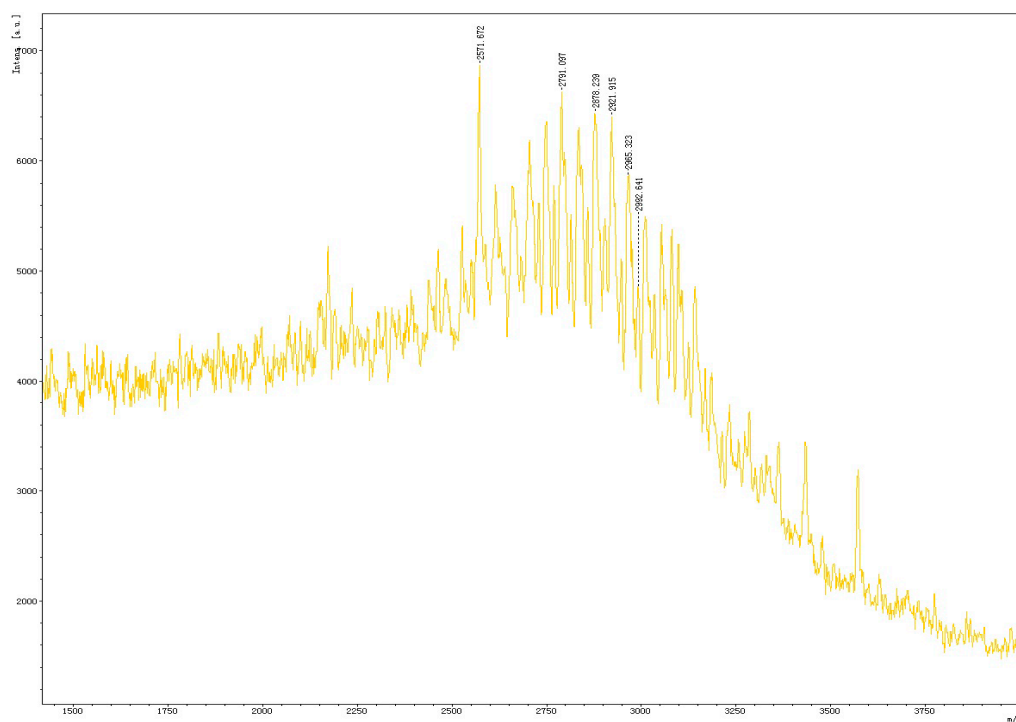

Figure S16. MALDI-TOF of compound 4d.

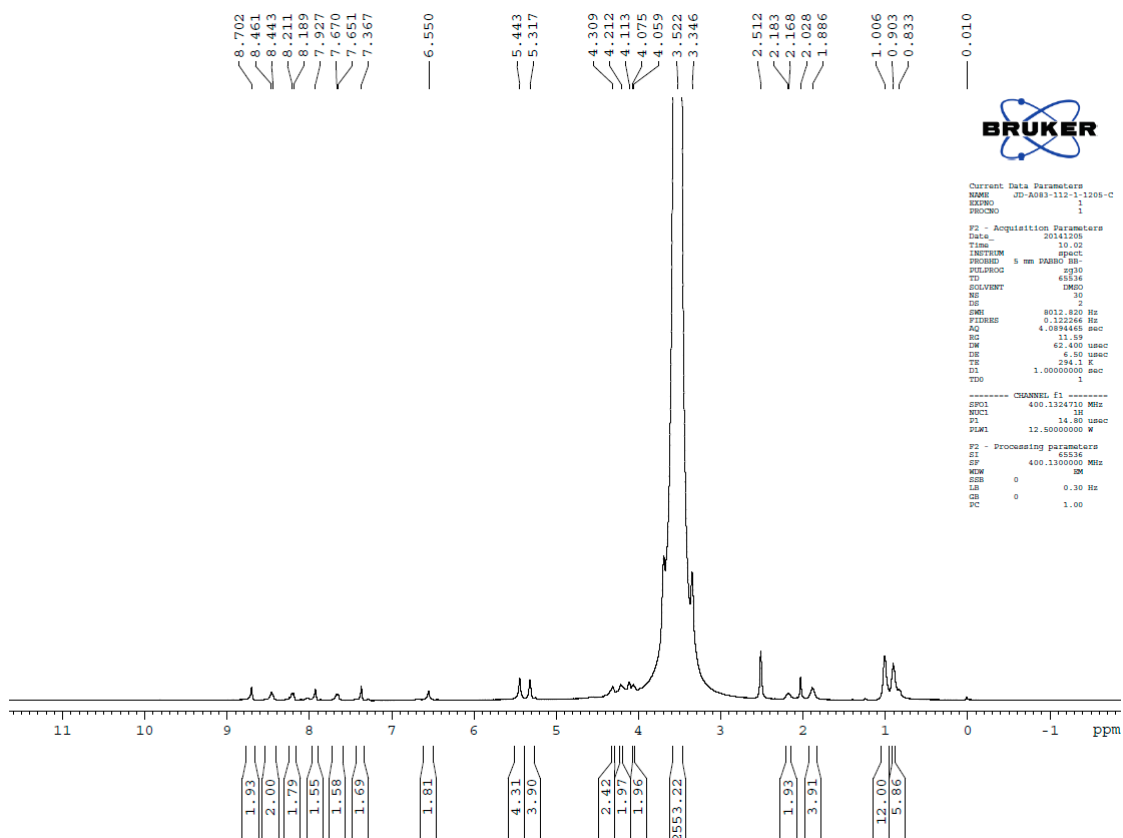Figure S17. <sup>1</sup>H-NMR of compound 4e.

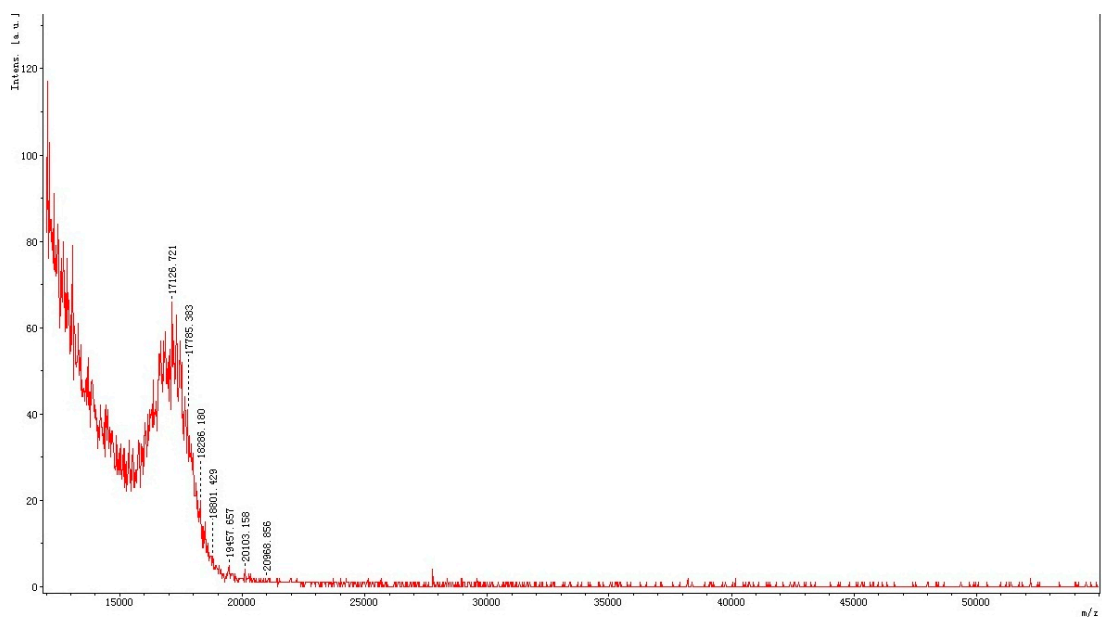

Figure S18. MALDI-TOF of compound 4e.

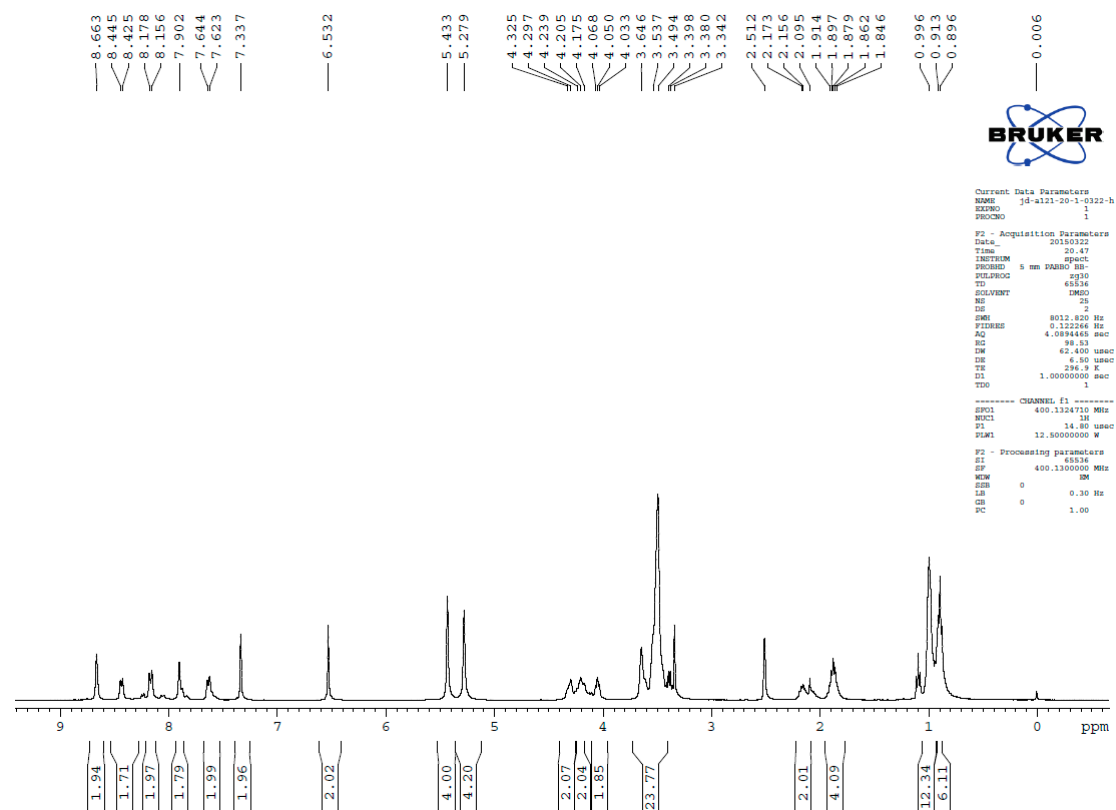Figure S19. <sup>1</sup>H-NMR of compound 4f.

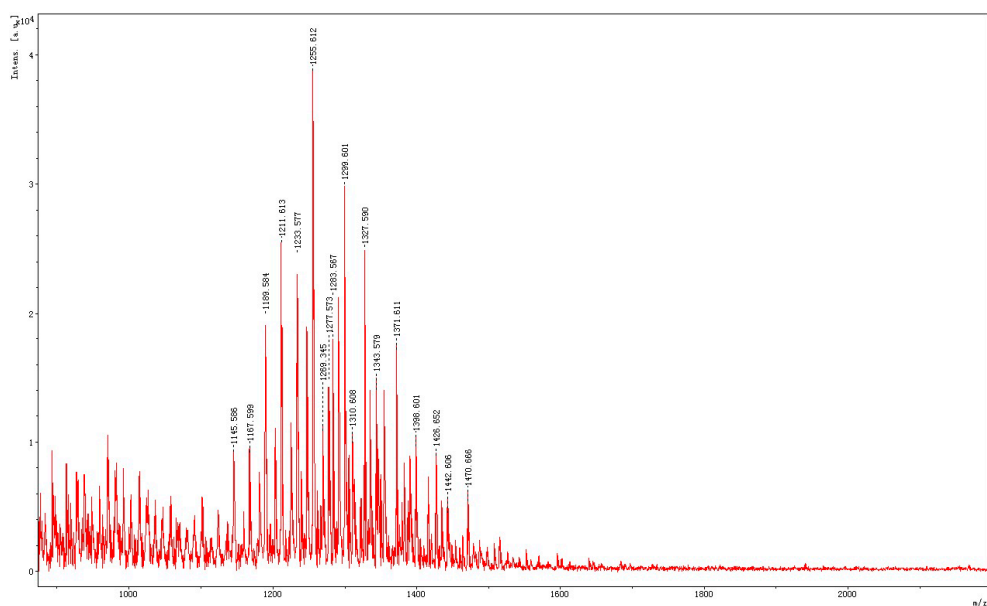

Figure S20. MALDI-TOF of compound 4f.

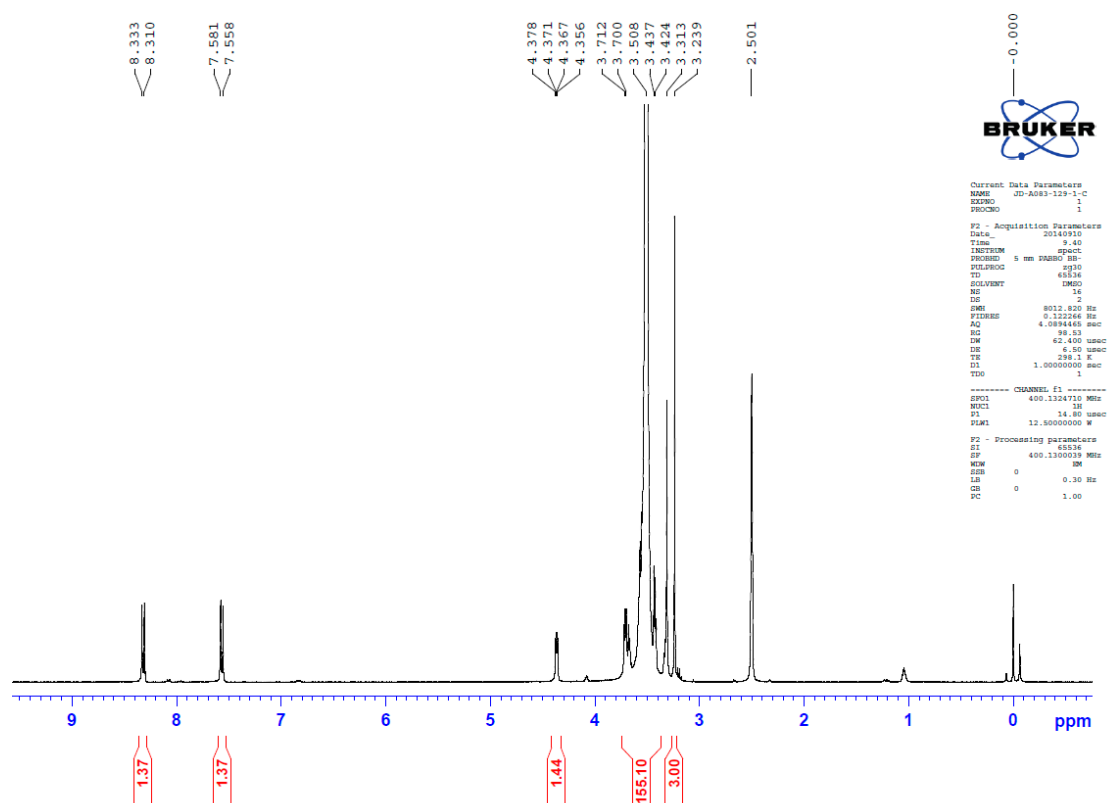Figure S21. <sup>1</sup>H-NMR of compound 1b.

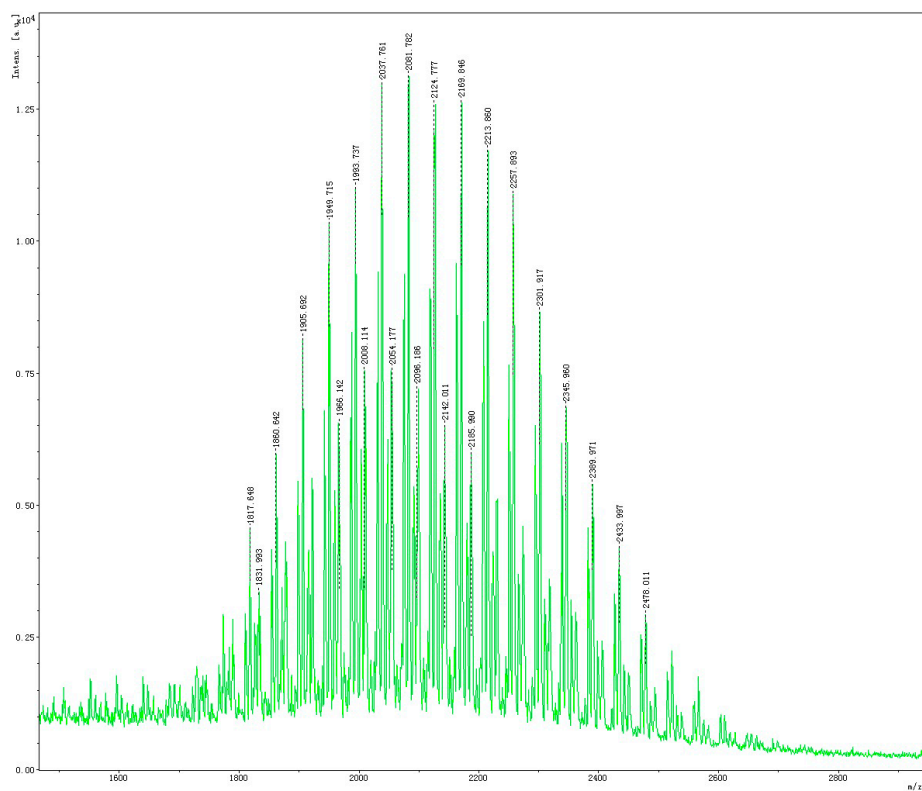

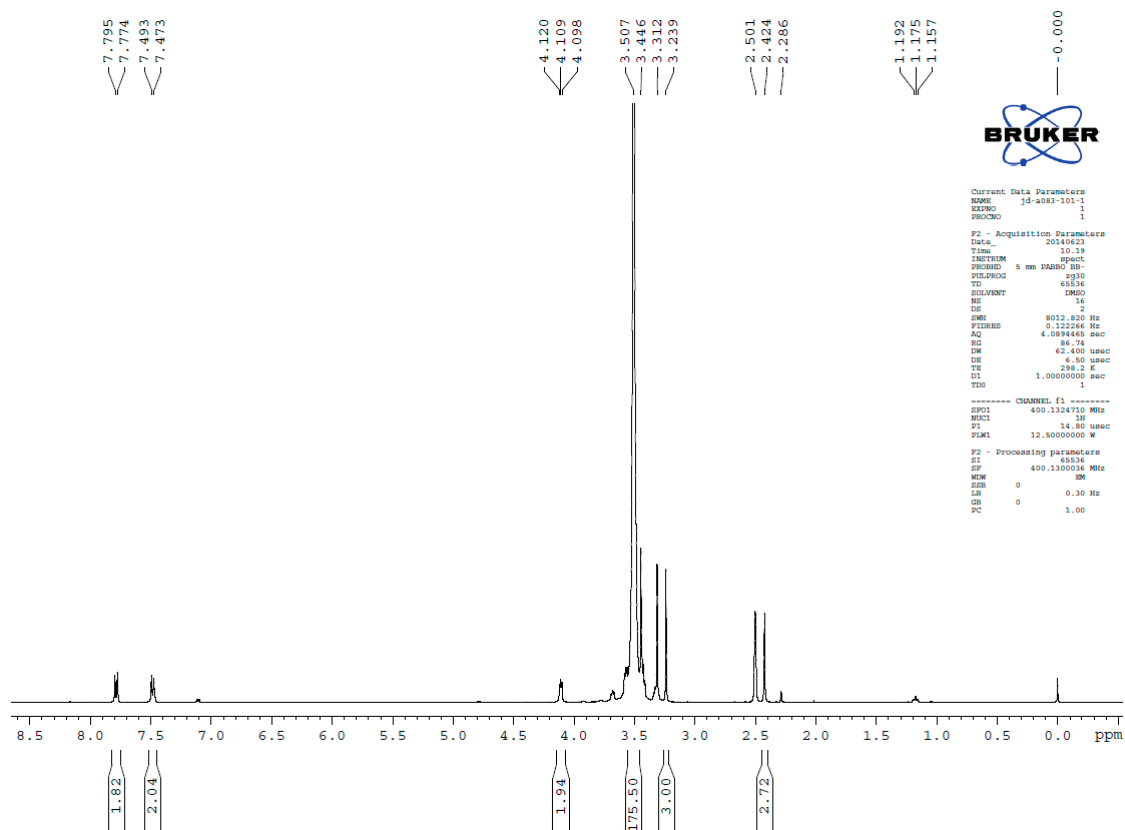Figure S24. <sup>1</sup>H-NMR of compound 7.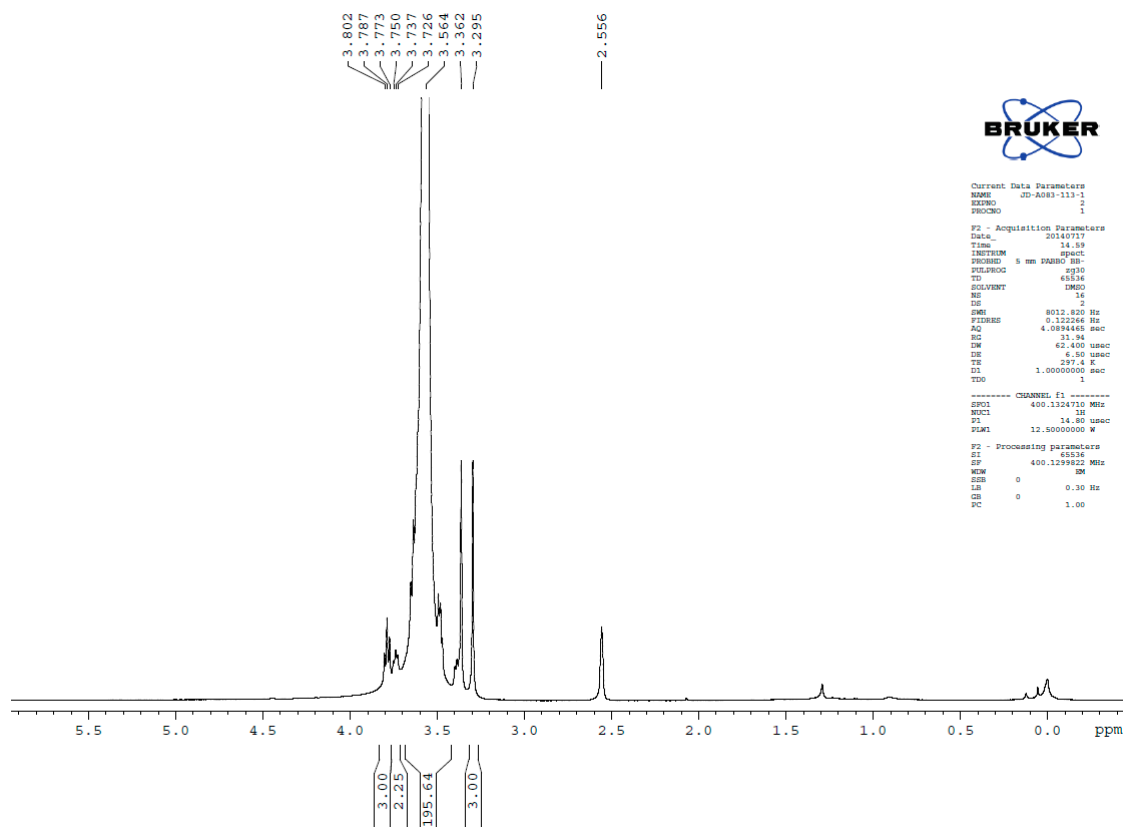Figure S25. <sup>1</sup>H-NMR of compound 8.

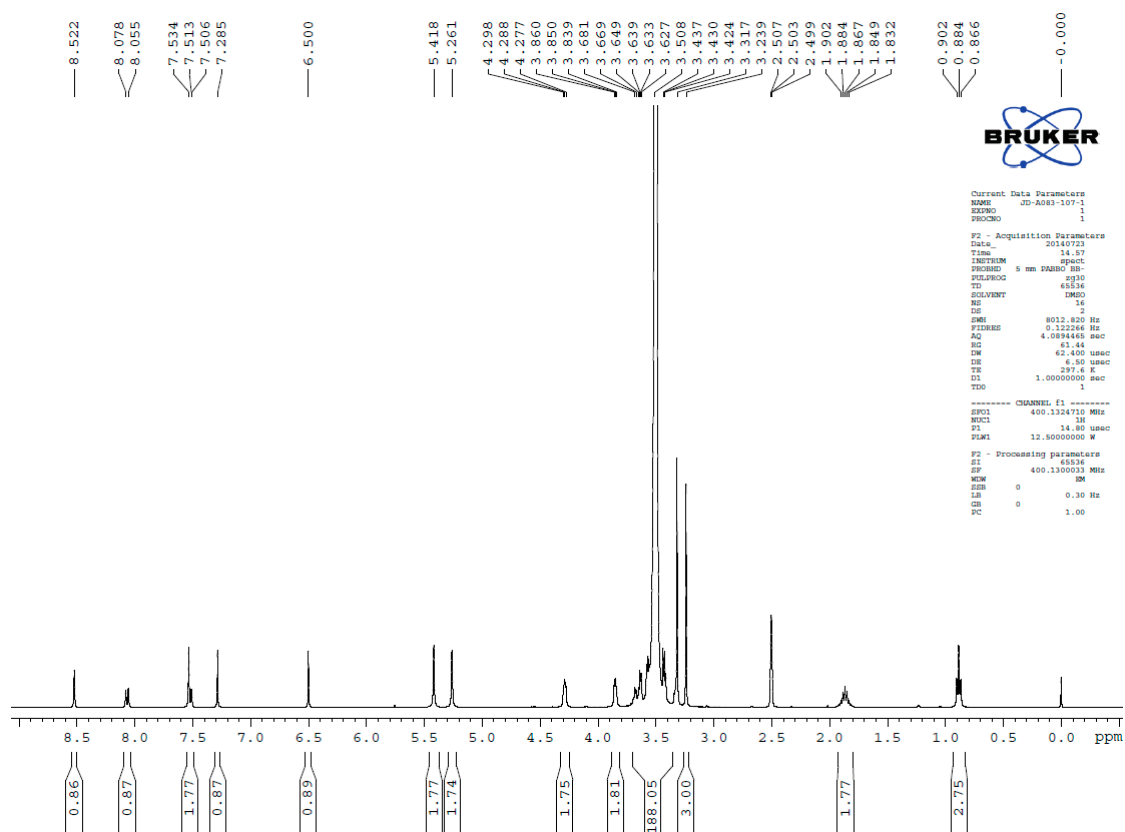Figure S26. <sup>1</sup>H-NMR of compound 6.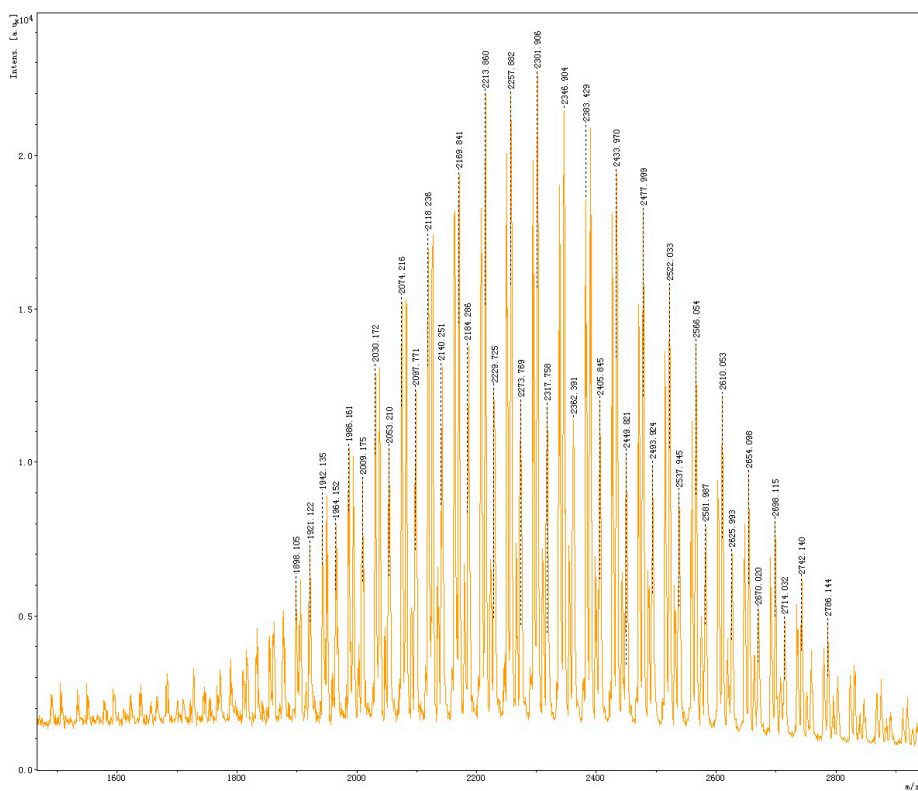

Figure S27. MALDI-TOF of compound 6.
